# Supplementary material for: Precision Farming in Aquaculture: Assessing gill health in Atlantic salmon (Salmo salar) using a non-invasive, AI-driven behavioural monitoring approach in commercial farms
Source: Research Square preprint supplement (doi:10.21203/rs.3.rs-6653910/v1), 2025-05-20
Supplement: Supplementary file 1 [file e4eb41c4f85b0025f29bd841.docx]

**Appendix A**


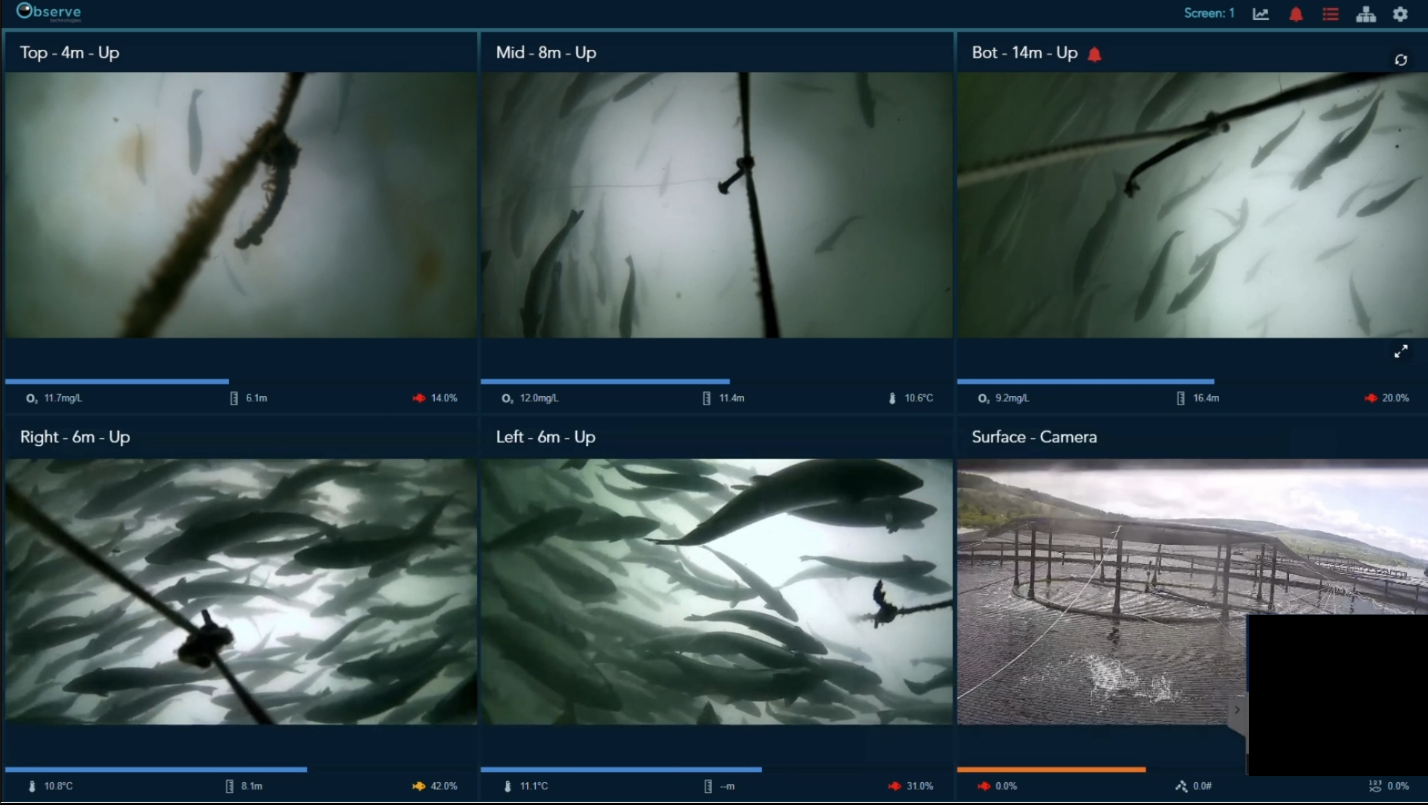


Figure A.1 Example of a screenshot from a video showing the five cameras at Farm A. Each panel displays temperature, depth, and oxygen (when available), with the coloured fish icon in the bottom right indicates the calculated activity (%) at that moment.


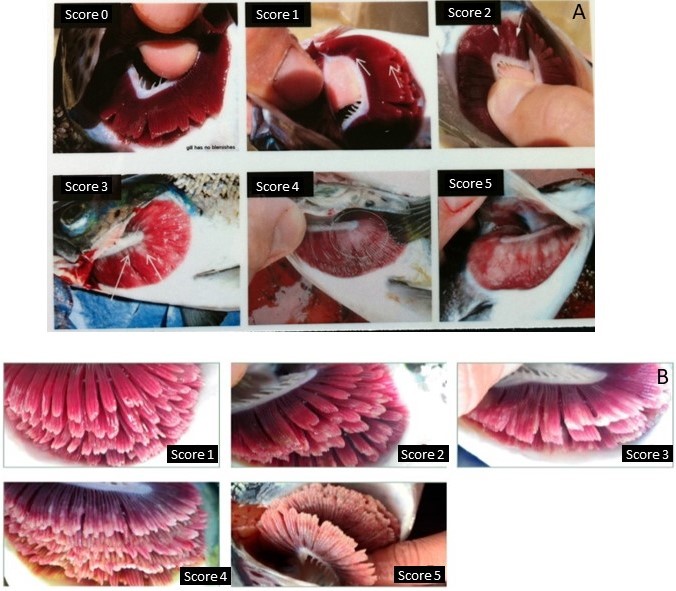


Figure A.2 The scorecards used by farmers to assess AGD (A) and PGD (B) scores on-site. Images courtesy of Bakkafrost Scotland, with contributions from Skretting (Mark Adams and Vet-Aqua International; A) and Marine Harvest Scotland (now Mowi Scotland; B).

*
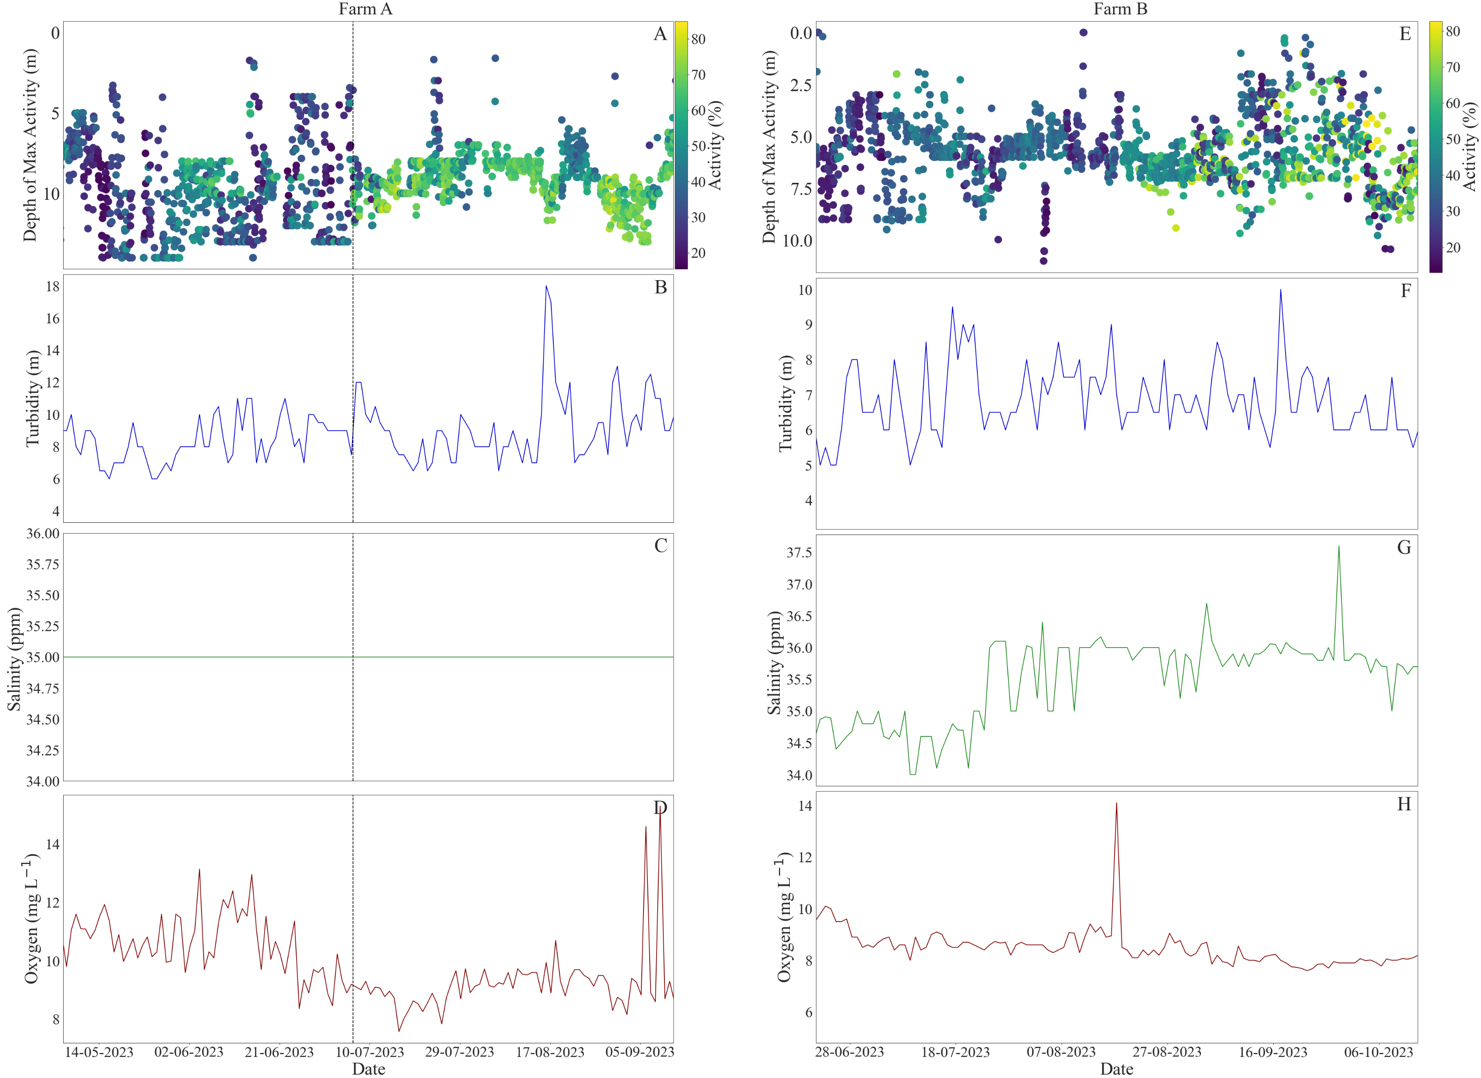
*

Figure A.3 Water quality parameters measured daily throughout the study period from the barge visible in Fig. 1 at each site. Panels show the depth of maximum activity with colours indicating the hourly-averaged activity levels observed at that depth (a,e), turbidity (m) measured with a Secchi disk (b, f), salinity (ppm), and dissolved oxygen (mg L-1). Note: given the consistent reading of salinity at Farm A, this suggests it was an approximation rather than precisely measured.
